# Supplementary material for: Ballooning‐Interchange Instability in the Near‐Earth Plasma Sheet and Auroral Beads: Global Magnetospheric Modeling at the Limit of the MHD Approximation
Source: PubMed Central journal article supplement (PMC7507213; doi:10.1029/2020gl088227), 2020-07-14
Supplement: GRL-47-e2020GL088227-s001.pdf [file GRL-47-e2020GL088227-s001.pdf]

# Ballooning-interchange instability in the near-Earth plasma sheet and auroral beads: Global magnetospheric modeling at the limit of the MHD approximation

K. A. Sorathia<sup>1</sup>, V.G. Merkin<sup>1</sup>, E.V. Panov<sup>2</sup>, B. Zhang<sup>3</sup>, J.G. Lyon<sup>4</sup>, J.

Garretson<sup>1</sup>, A.Y. Ukhorskiy<sup>1</sup>, S. Ohtani<sup>1</sup>, M. Sitnov<sup>1</sup>, M. Wiltberger<sup>5</sup>

<sup>1</sup>The Johns Hopkins University Applied Physics Laboratory, Laurel, MD, USA

<sup>2</sup>Space Research Institute, Austrian Academy of Sciences, Graz, Austria

<sup>3</sup>Department of Earth Sciences, University of Hong Kong, Hong Kong

<sup>4</sup>Department of Physics and Astronomy, Dartmouth College, Hanover, NH, USA

<sup>5</sup>High Altitude Observatory, National Center for Atmospheric Research, Boulder, CO, USA

## Contents of this file

1. Figures S1 to S4

## Additional Supporting Information (Files uploaded separately)

1. Captions for Movies S1 to S2

**Movie S1.** Simulation at a glance. Left panel) Residual, i.e. non-dipolar, vertical magnetic field in the SM equator. The  $B_z = 0$  contour is overlaid in magenta. Time is measured relative to the southward IMF turn ( $T = 0$ ). Right panel) Gas pressure in

---

the meridional plane. Insets show field-aligned currents on the ionospheric grid in the northern and southern hemisphere.

**Movie S2.** Magnetosphere-ionosphere coupling during growth phase. Top panel) Field-aligned current density dipole-mapped from the inner boundary of the MHD simulation, at  $2R_E$ , to the ionospheric grid. Grid denotes lines of constant magnetic latitude and longitude. Bottom panel) Flux-tube integrated entropy calculated at each point in the equator. Overlaid contours are the magnetic field projection of the regular MLON-MLAT grid shown in the top panel to the magnetospheric equator.

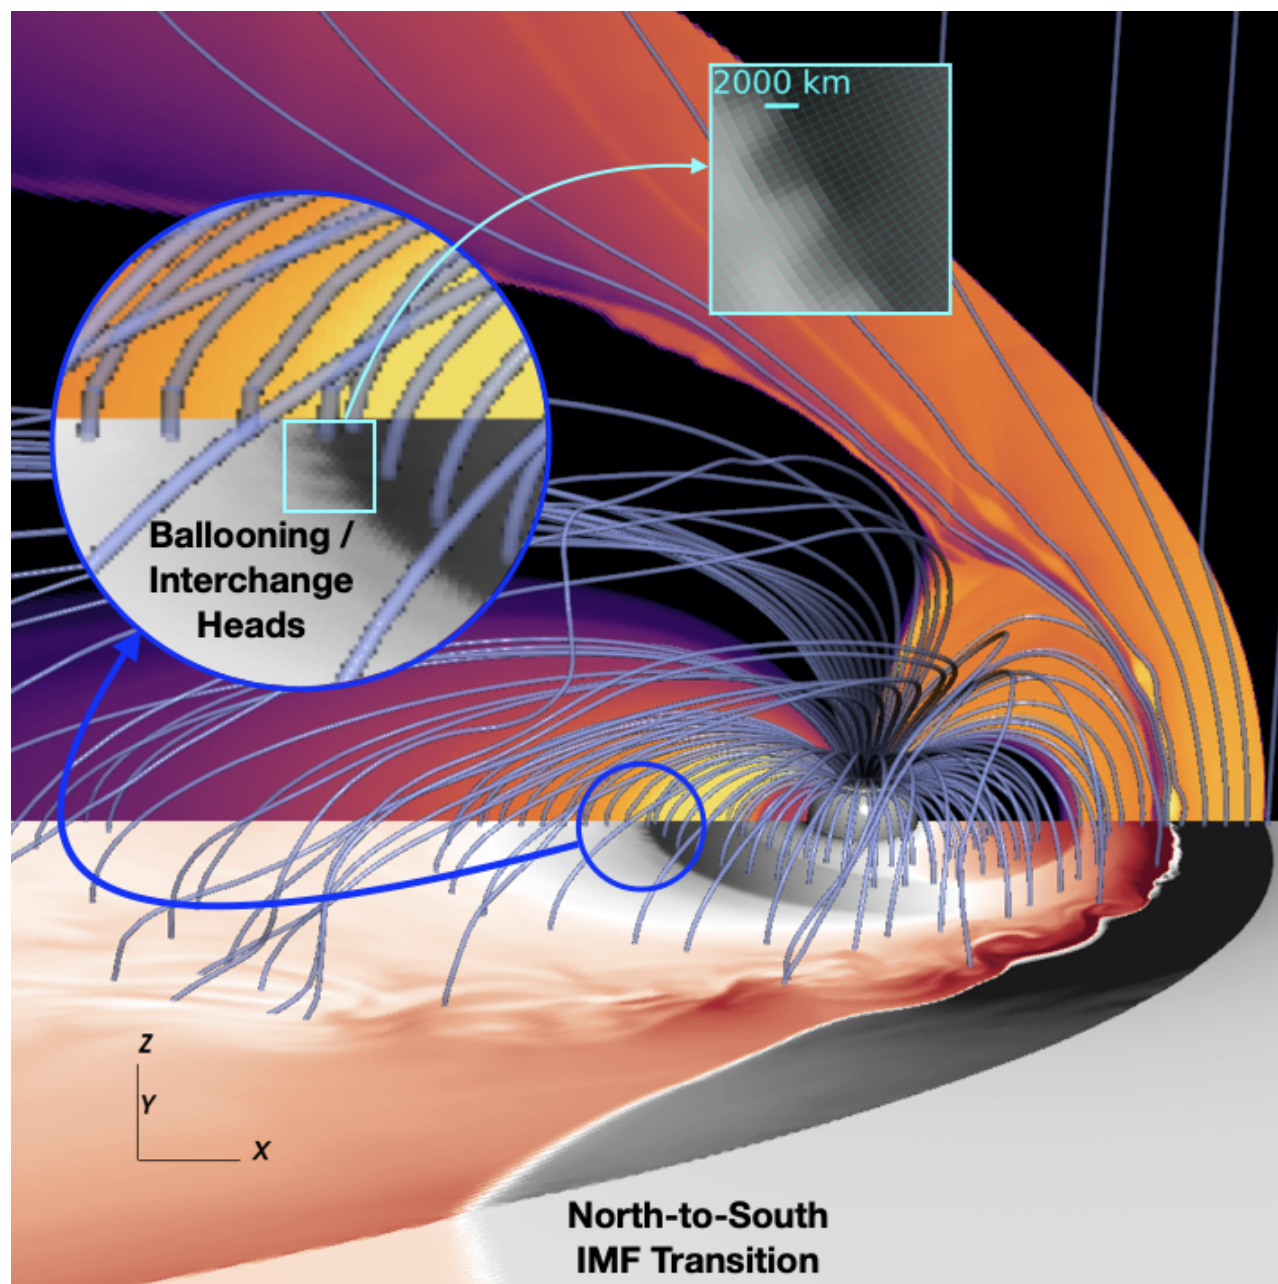

**Figure S1.** Three-dimensional visualization of the global simulated magnetosphere during growth phase. Depicted in the main panel are equatorial residual magnetic field and meridional pressure along with a sample of magnetic field lines. Progressive zoom-ins illustrate the BI structures with the deepest layer of zoom also showing the equatorial computational grid.

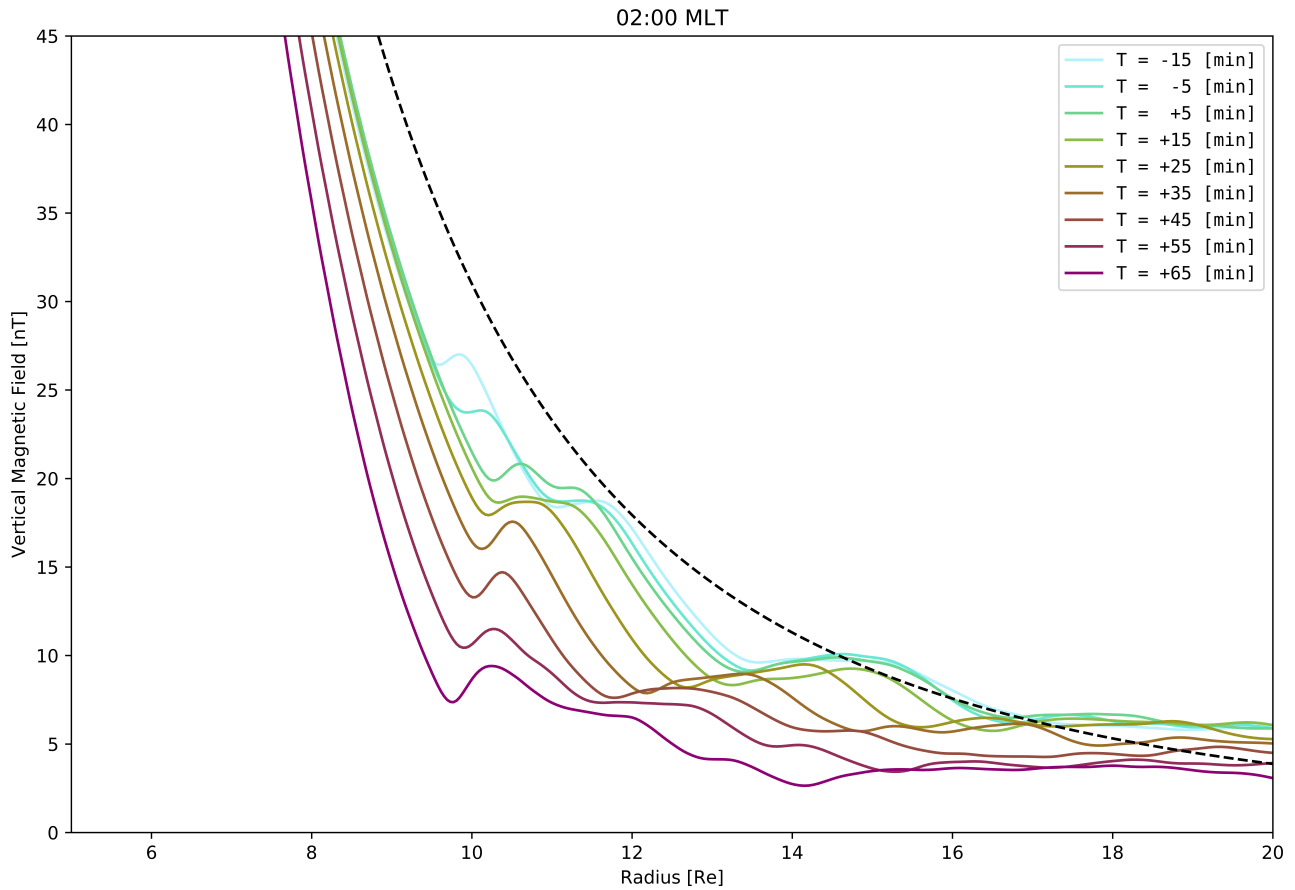

**Figure S2.** Radial profiles, taken in the equator at 0200 MLT, of vertical magnetic field at selected times. Time is measured relative to southward IMF turning ( $T = 0$ ). Dashed line shows the corresponding dipole field profile.

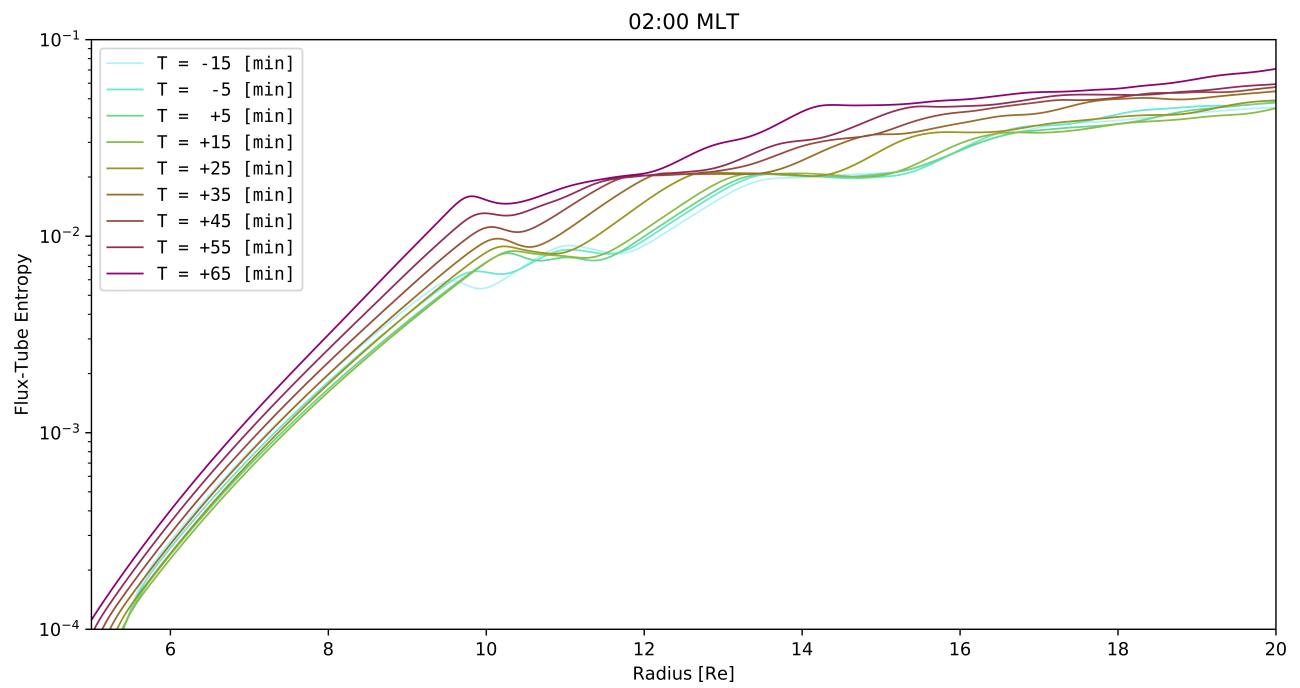

**Figure S3.** Flux-tube entropy plotted in the same manner as Fig. S1.

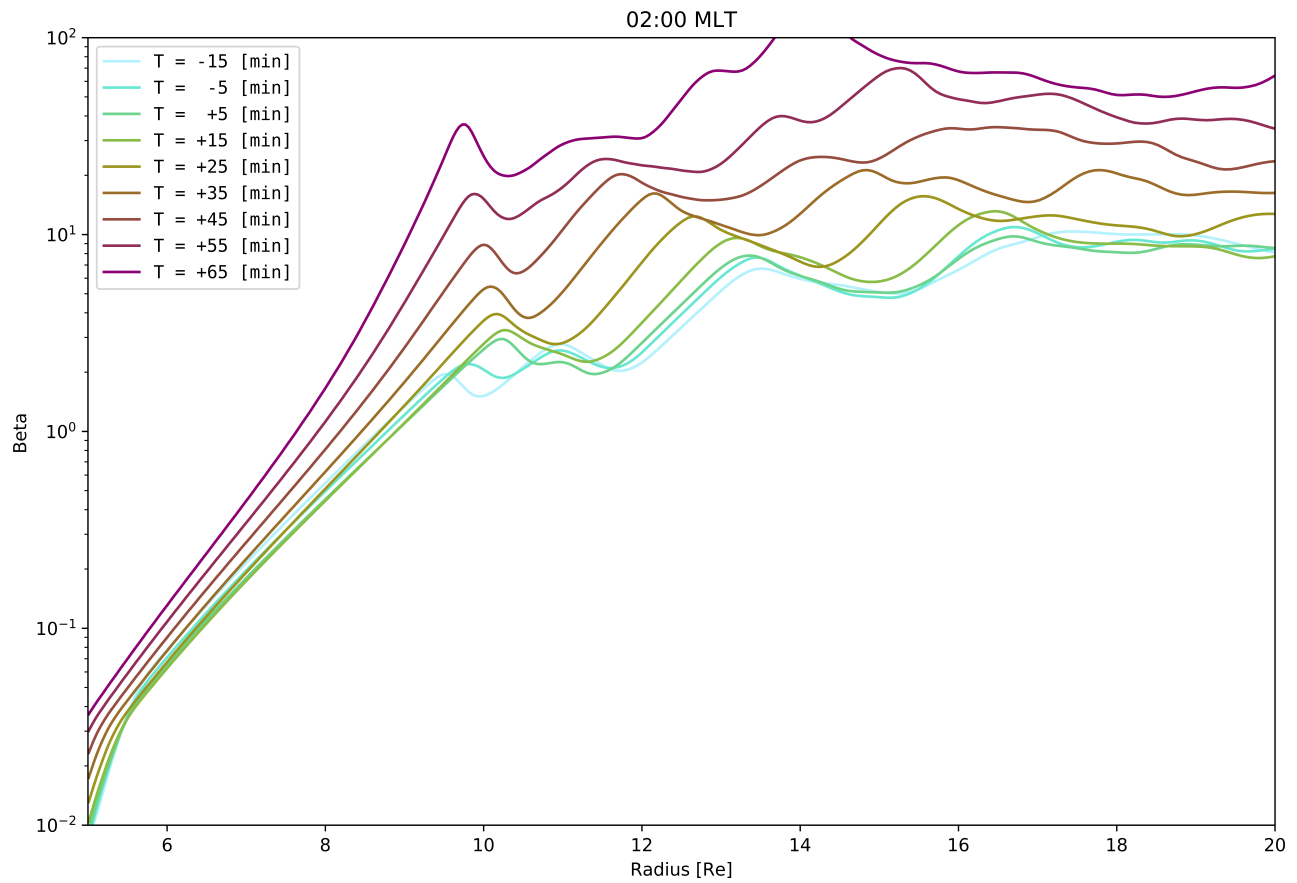

**Figure S4.** Plasma  $\beta$  plotted in the same manner as Fig. S1.
